# Supplementary material for: Nitrate Source and Transformation in Groundwater under Urban and Agricultural Arid Environment in the Southeastern Nile Delta, Egypt
Source: MDPI journal article supplement (doi:10.3390/w16010022), 2023-12-20
Supplement: s1 [file s1]

Archive with 1 entries (1 files):
- water-2758735-supplementary.pdf
